# Supplementary material
Source: bioRxiv or medRxiv preprint supplement (https://www.biorxiv.org/highwire/filestream/57461/field_highwire_adjunct_files/0/062950-1.pdf)
Supplement: Supplementary file [file 062950-1.pdf]

# **Genome-wide Variants of Eurasian Facial Shape Differentiation and a prospective model of DNA based Face Prediction**

Lu Qiao<sup>1</sup>, Yajun Yang<sup>2,3</sup>, Pengcheng Fu<sup>4</sup>, Sile Hu<sup>1</sup>, Hang Zhou<sup>1</sup>, Shouneng Peng<sup>1</sup>,  
Jingze Tan<sup>2,3</sup>, Yan Lu<sup>1</sup>, Haiyi Lou<sup>1</sup>, Dongsheng Lu<sup>1</sup>, Sijie Wu<sup>1</sup>, Jing Guo<sup>1</sup>, Li Jin<sup>1,2,3,6</sup>,  
Yaqun Guan<sup>5</sup>, Sijia Wang<sup>1,6,\*</sup>, Shuhua Xu<sup>1,6,7,\*</sup>, Kun Tang<sup>1,\*</sup>

## **SUPPLEMENTARY NOTE**

This supplementary note mainly describes the methods and detailed results related to the prospective face prediction model.

### **GWA analyses on within-Uyghur phenotypes**

To capture the majority of the common facial shape variance for prediction, additional phenotypes based on inter-landmark measurements, PCA and PLS were defined mainly for the within-Uyghur variations, in complement to the ancestry-divergent traits. For the landmark based phenotypes, other than the 10 ancestry-divergent phenotypes, the remaining 26 traits were defined as within-Uyghur traits. For PCA phenotypes, we carried out PCA on the UIG-D 3dDFM data for six facial features separately. The top three PCs (PC1, PC2, PC3) were used as within-Uyghur phenotypes that together explained ~60% variance. For PLS based traits, the models consist of the first component (PLS1) and the top two components (PLS2) were defined as the within-Uyghur phenotypes for each facial feature.

Hereto, the ancestry-divergent and within-Uyghur phenotypes summarized the facial features of Uyghurs. To reduce the computational burden and avoid imprecision in imputation, GWA analyses for facial prediction were carried out only on the genotyped SNPs in UIG-D.

### **Predicted face (PF) composition**

For each of the top SNPs found in the ancestry-divergent GWAS and

within-Uyghur GWAS, we divided the 3dDFM images into three genotype groups, and the within-group mean shapes were obtained as  $\mu'_g$  where  $g$  is the genotype. A residual face can be obtained for each genotype by subtracting the genotype mean by the global cohort mean shape as,

$$r_g = \mu'_g - \mu \quad (1)$$

where  $\mu$  was the global mean. We superimposed all the re-scaled residual faces of each SNP according to their true genotype information, onto the global mean to construct a face of prediction:

$$f = \mu + \alpha \sum r_{g(i)} \quad (2)$$

where  $\alpha$  was the effect coefficient and  $i$  is the SNP index. The coefficient  $\alpha$  was proposed to maximize the similarity of the predicted and actual faces. Briefly, a PF was calculated for every individual in the discovery panel as described by equation (2), where  $\alpha$  varies. PSD was used to calculate the distance between the PF and actual face for each individual. The value of  $\alpha$  was determined when the minimum average PSD was achieved within a gender group. This same  $\alpha$  was also used for the independent cohort as well as the randomly simulated faces. For the predicted model built by 277 top SNPs, the coefficient was determined to be 0.312 in females ( $\alpha_f$ ) and 0.252 in males ( $\alpha_m$ ) (Fig. S7).

### **Generation of random-genotype predicted faces (RGF) set**

RGF was generated in the similar way as the PF, specifically by synthesis of a 3D face model via equation (2), based on a given set of genotypes. The only difference

was that a PF used an actual set of genotypes, whereas the genotype set for a RGF was randomly permuted from the known frequencies of genotypes in the combined UIG cohort .

### **Evaluation of the face prediction**

For each sample, we described the degrees of similarity between predicted and actual face in the respects of shape space angle (SSA). The SSA was the angle between the predicted and actual faces in the  $3 \times 32,251$  face-space. Either RGF or RAF was compared to PF to test whether the face prediction was significantly better than random, and two types of tests were carried out: (1) inter-distribution test: For a group of  $N$  individuals, we can generate a corresponding RGF/RAF set and derive the pairwise SSA distribution between the actual and random prediction faces, which is called the random SSA distribution. We repeat the RGF/RAF simulations ten times to obtain a much bigger and therefore more robust random SSA distribution. This was compared against the true SSA distribution between the PF and actual faces using Student's T test. (2) single-statistic test: For a group of  $N$  individuals, the average SSA score ( $SSA_{avg}$ ) was calculated and used as the test statistic. Here, we named such similarity statistics between PF and actual face as true  $SSA_{avg}$ . For the case of RGF, we generated the same number ( $N$ ) of RGF as described above and calculated the corresponding  $SSA_{avg}$ . This was repeated 1,000 times and the distributions of RGF  $SSA_{avg}$  under the null hypothesis were compared to the true  $SSA_{avg}$ . For RAF, as there was a limited number of actual face in the independent panel, we applied a

leave-one-out (LOO) procedure. For each iteration of random  $SSA_{avg}$  calculation, every individual in UIG-R was tested in turn. Its PF was generated first and its corresponding actual face was removed from the UIG-R actual faces panel. A RAF was randomly sampled from the remaining panel of actual faces without replacement and its SSA to the tested face was calculated and averaged over the  $N$  individuals. Doing so for  $N-1$  times until the RAF panel was complete, the distributions of RAF  $SSA_{avg}$  under the null hypothesis was compared to the true  $SSA_{avg}$ . Assuming normality of the null distributions, the probability of the true statistics was either given as the percentage of random cases scored higher than the true ones if any, or the standard difference of the true statistics from the null expectation  $t = (s - m)/\sigma$  was queried against the normal distribution function (pnorm function in the R statistic package) to give the estimated  $P$  value, where  $s$  was the observed value, and  $m$  and  $\sigma$  were the mean and standard deviation of the null distribution.

In the independent panel of UIG-R, for inter-distribution test (Fig. 5B), there are extensive overlaps between PF and RGF/RAF distributions in female ( $P=0.87$  in RGF;  $P=0.73$  in RAF), but PF showed moderately lower than RGF ( $P=0.01$ ) and RAF ( $P=0.02$ ) in males. For single-score test (Fig. 5C), the average SSA of prediction ( $SSA_{avg}=89.07$ ) was not different ( $P=0.35$ ) from the null RGF expectation in females, but was slightly and significantly lower ( $SSA_{avg}=83.97$ ,  $P=0.02$ ) than the null RGF expectation in males. When compared to RAF (Fig. 5C), the SSA distributions indicated a similar trend, that females did not show significant difference between PF and RAF ( $P=0.34$ ), whereas in males PF was significantly more similar to the actual

face than the RAF ( $P=0.02$ ). To account for the potential linkage disequilibrium (LD) within the top SNPs, we further trimmed the top SNPs set either by pairwise LD ( $r^2 < 0.8$ , 240 top SNPs set) or inter-marker physical distance ( $>400\text{kb}$ , 209 top SNPs set), the prediction became slightly better and the general trends remained unchanged (Fig. S7; Table S12).

### **Forensic scenarios simulation**

In a simulative forensic scenario, we randomly set 8 individuals as the hypothetical candidates, one of them being the true suspect. The SSA scores were obtained between the actual face and PF for each individual as depicted in Figure 6A. If the true suspect happened to have the lowest SSA score among the 8 candidates, the identification was called successful, otherwise failure. For a fixed sample panel of UYG-R, the true accuracy rate can be obtained by averaging over all the possible combinations of 8 candidates. To test whether the true accuracy rate was significantly higher than random level, we reshuffled the pairwise corresponding similarity SSA scores randomly between the actual faces and PFs. For such a reshuffled dataset, we applied the pick-one-from-eight procedure 10,000 times as above to obtain the corresponding accuracy rate for this random dataset. We reshuffled the pairwise score matrix 1,000 times and obtained 1,000 random accuracy rates for the given UYG-R configuration. On account of missing the true corresponds between actual face and PF, the random accuracy rate would be around  $1/8$ . We utilized the proportion ( $P$ ) of how many random accuracy rates were larger than true accuracy rate as the empirical

p-value. The  $P$  level of 0.05 was used to determine whether the performance of PF showed significantly better accuracy rate than random situations in forensic scenario.

Compared with the accuracy rate from prediction model on 277 top SNPs (Fig. 5D), the LD controlled SNP panels showed weaker performance both in UIG-R males (increase 1.9% for 240 SNPs and 1.0% for 209 SNPs) and UIG-R females (increase +0.4% for 240 SNPs and +0.4% for 209 SNPs) (Table S13).

## SUPPLEMENTARY FIGURES

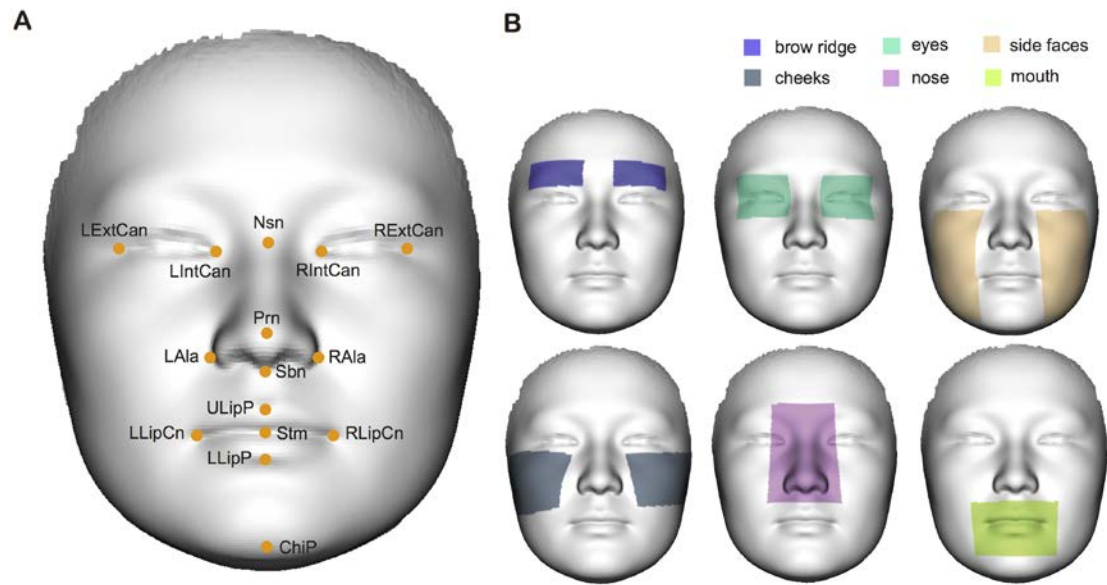

**Figure S1. The 15 landmarks and facial features extracted from 3D images. (A) the annotation of the fifteen landmarks. (B) the extraction of six facial features on the 3dDFM data.**



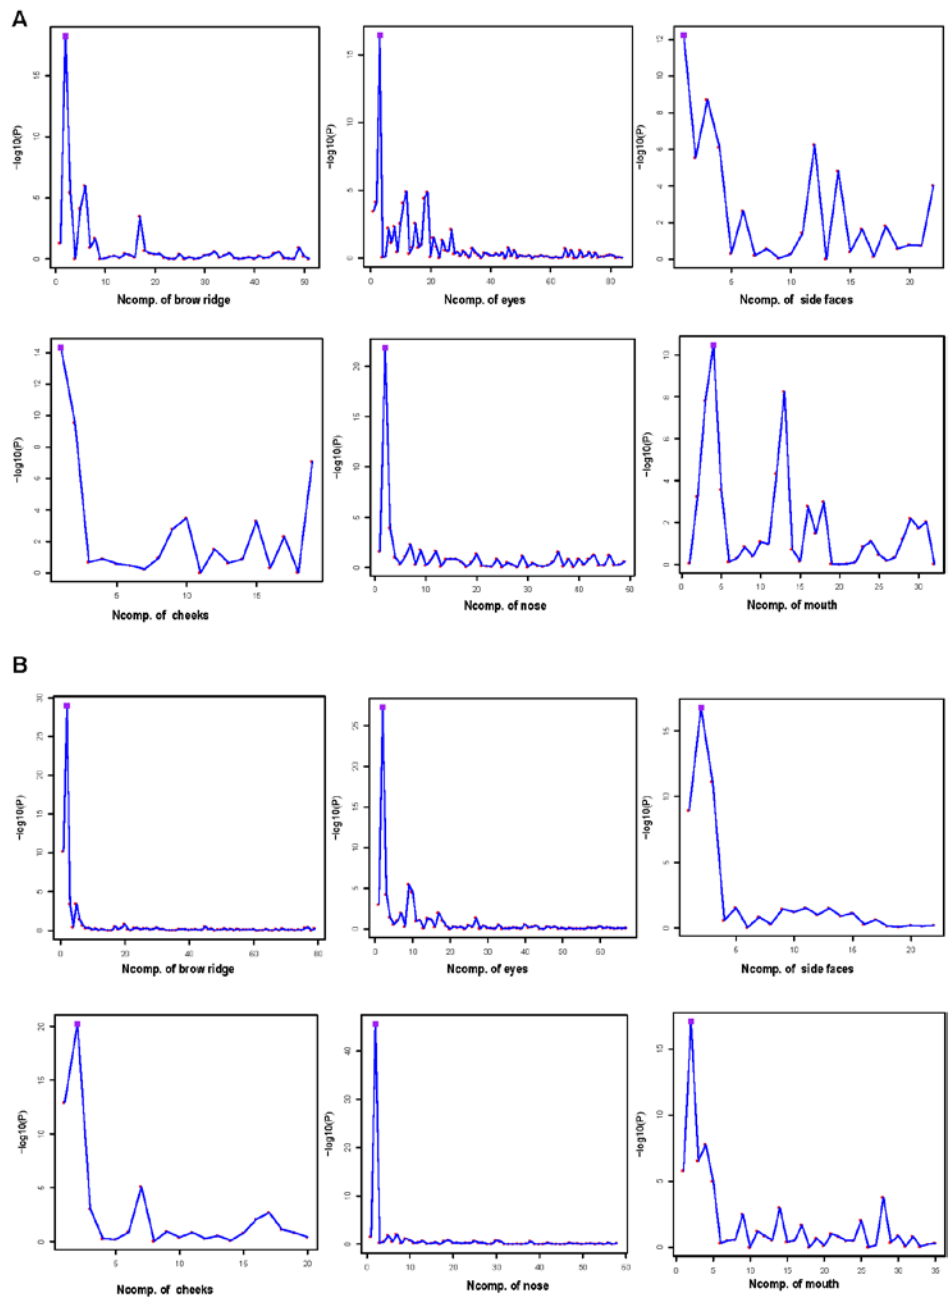

**Figure S2. Selection of segregating Principal Components for ancestry-divergent phenotypes in the GWAS analyses.** The 3dDFM data from EUR and HAN-TZ are decomposed into perpendicular dimensions using PCA for six features separately. The top PCs who explain 98% total variance are extracted and compared segregations between EUR and HAN-TZ one by one using Students' Test. The purple points in the scree plot show sPC numbers. (A) in females, (B) in males.

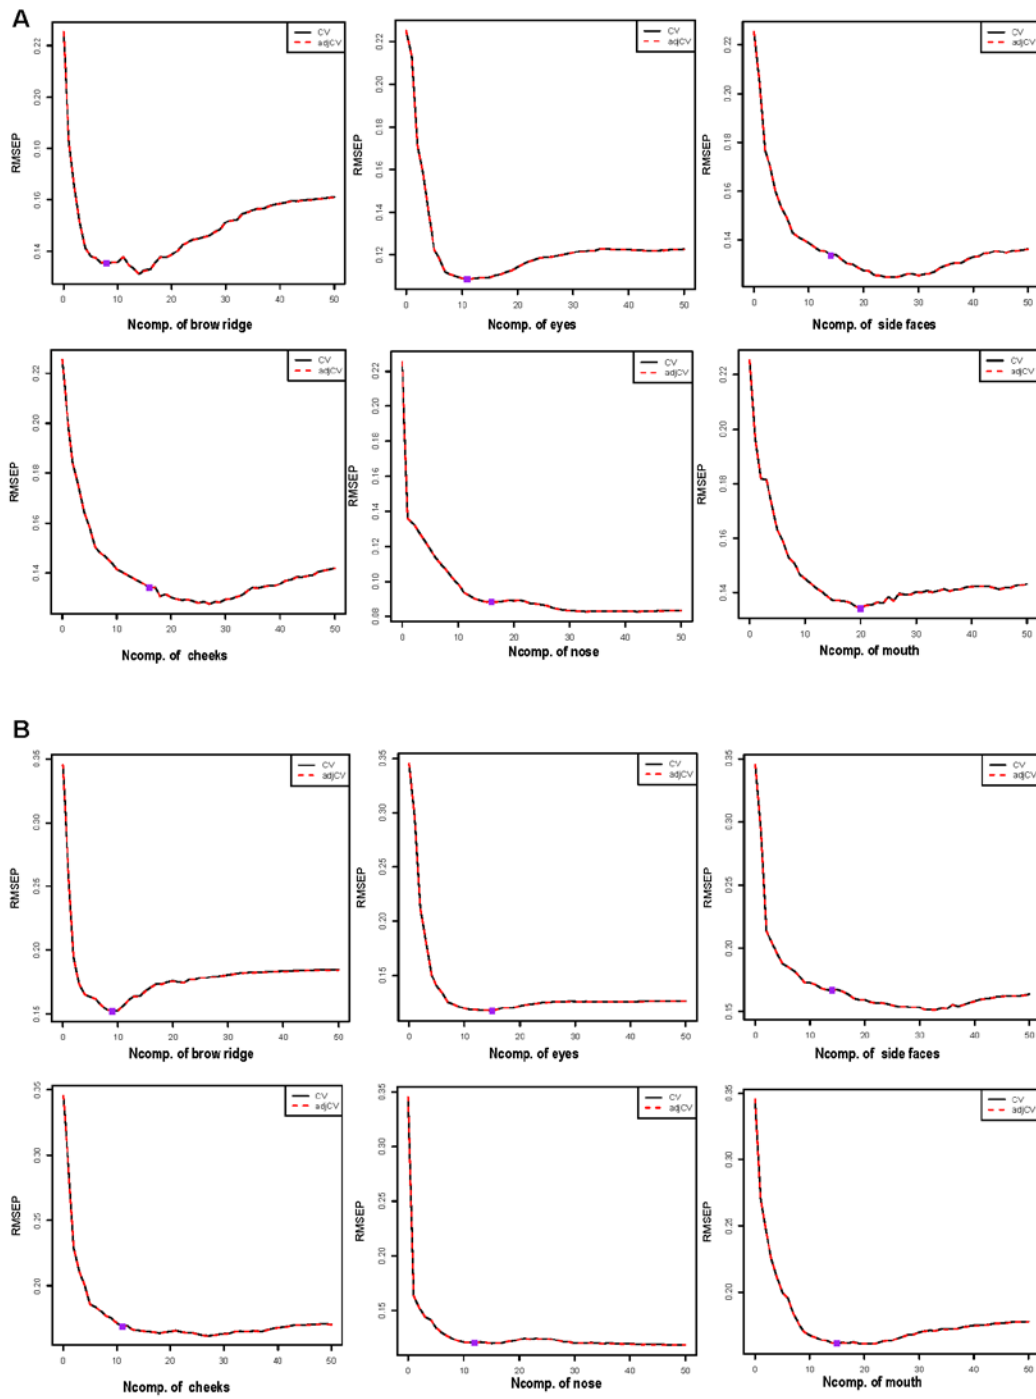

**Figure S3. Selection of segregating partial least square space for ancestry-divergent phenotypes in the GWAS analyses.** Leave-one-out (LOO) cross-validation are performed to optimize PLS model and validation results are root mean squared error of prediction (RMSEP). The purple points in cross-validated RMSEP curves show sPLS components. (A) in females, (B) in males.

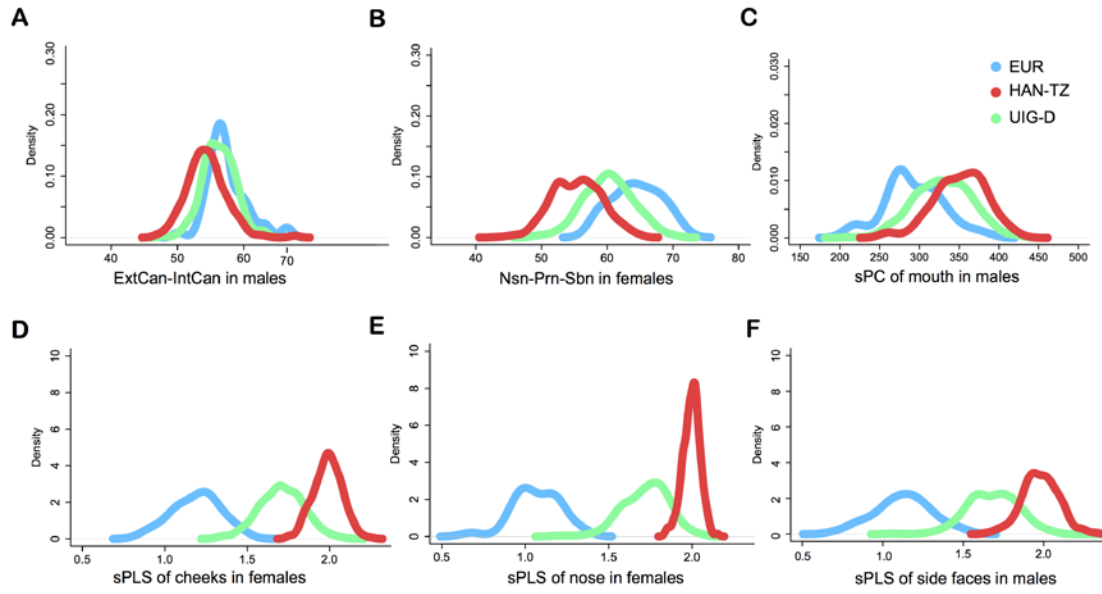

**Figure S4. Examples of ancestry-divergent phenotypes showing high divergence between EUR and HAN-TZ.** (A) distance of ExtCan-IntCan in males, (B) distance of Nsn-Prn-Sbn in females, (C) sPC of mouth in males, (D) sPLS of cheek in females, (E) nasal sPLS in females, (F) sPLS of side faces in males.

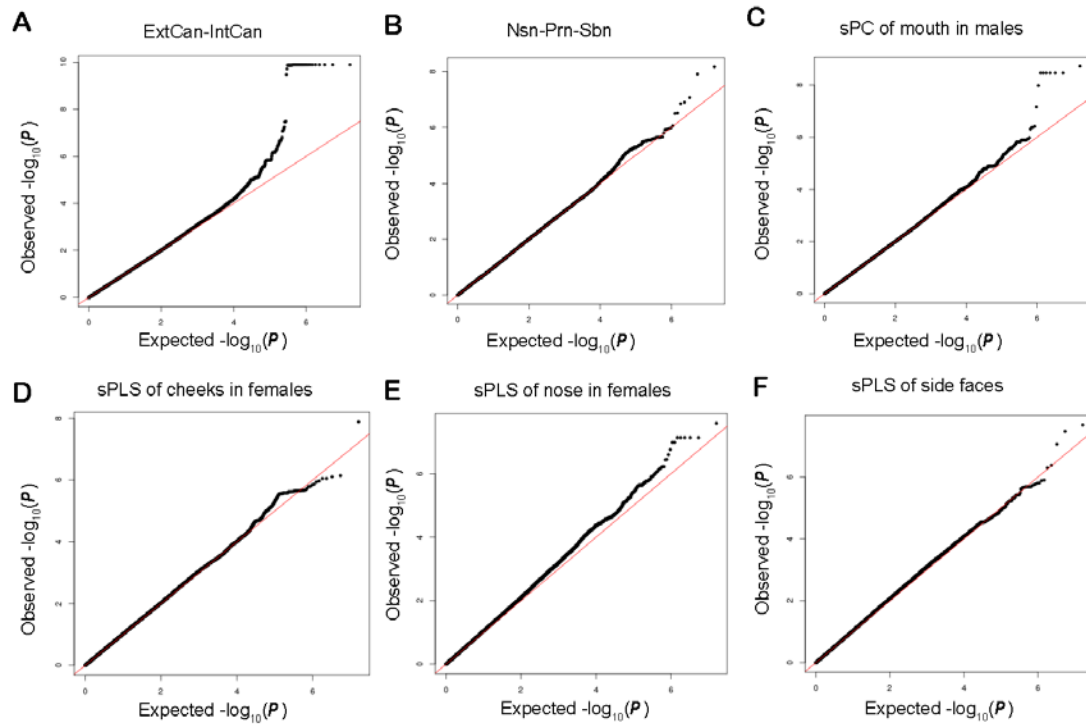

**Figure S5. Quantile-Quantile (Q-Q) plots for the GWAS.** Q-Q plots of (A) distance of ExtCan-IntCan in males, (B) distance of Nsn-Prn-Sbn in females, (C) sPC of mouth in males, (D) sPLS of cheek in females, (E) nasal sPLS in females, (F) sPLS of side faces in males.

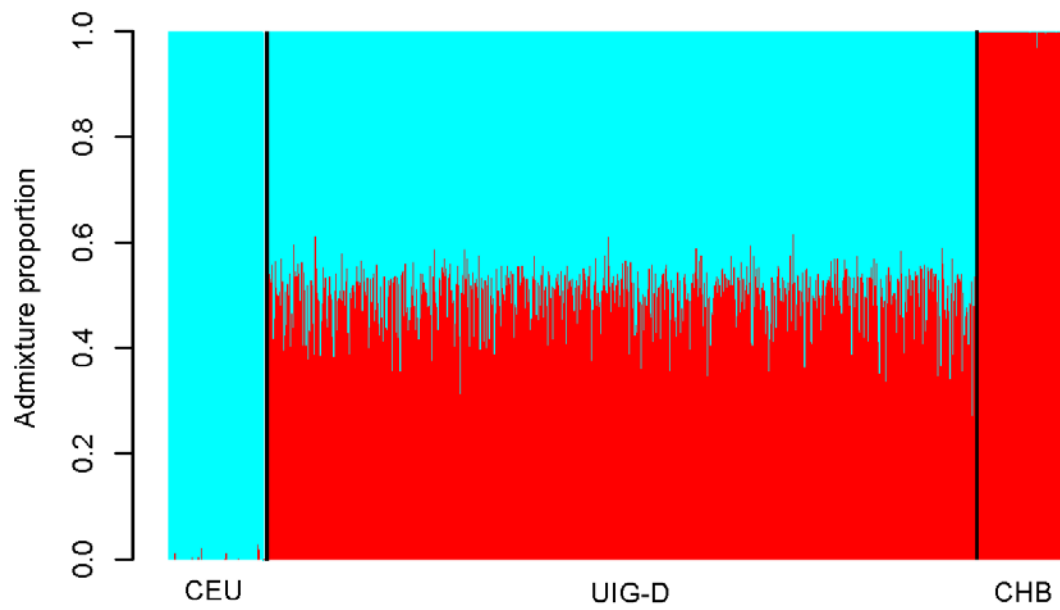

**Figure S6. Summary plot of individual admixture proportions.** Each individual is represented by a single vertical line broken into two colored segments, with lengths proportional to each of the two inferred clusters; blue indicates European ancestry and red indicates East-Asian ancestry. The admixture happened quite thoroughly in Uyghur at the individual level, making mean ancestry estimates for overall UIG-D are 49.96:50.04 of their European and East-Asian ancestries.

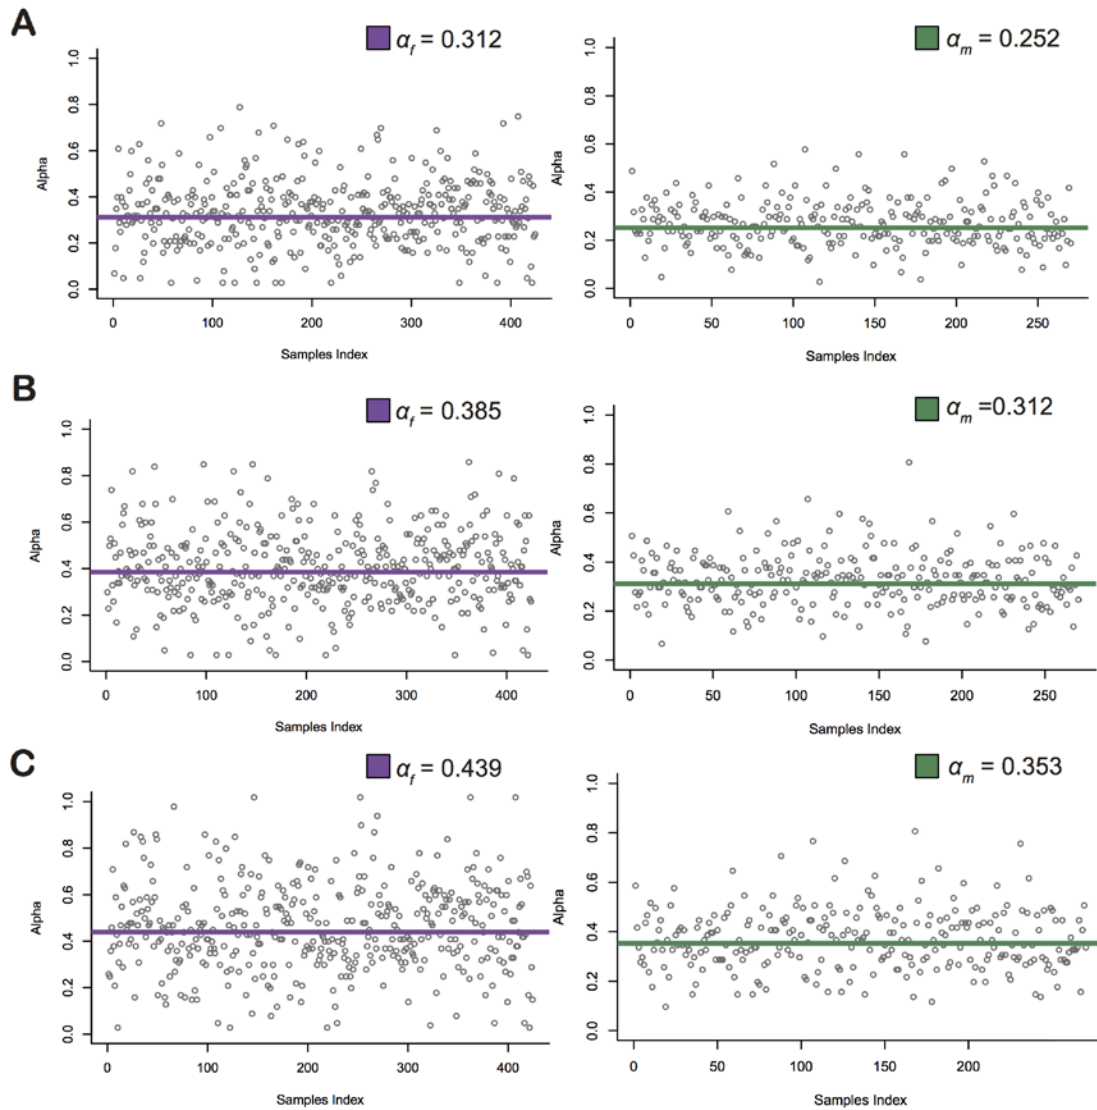

**Figure S7. Global effect coefficient  $\alpha_f$  and  $\alpha_m$  from UIG-D females and UIG-D males.** The coefficient  $\alpha$  was plotted respectively for (A) the full prediction model of 277 top SNPs, (B) the prediction model of 240 top-SNPs after trimming the SNPs of pairwise LD > 0.8, (C) the prediction model of 209 top-SNPs after trimming SNPs within a physical distance of < 400kb. The global coefficient was obtained by averaging over all individuals.

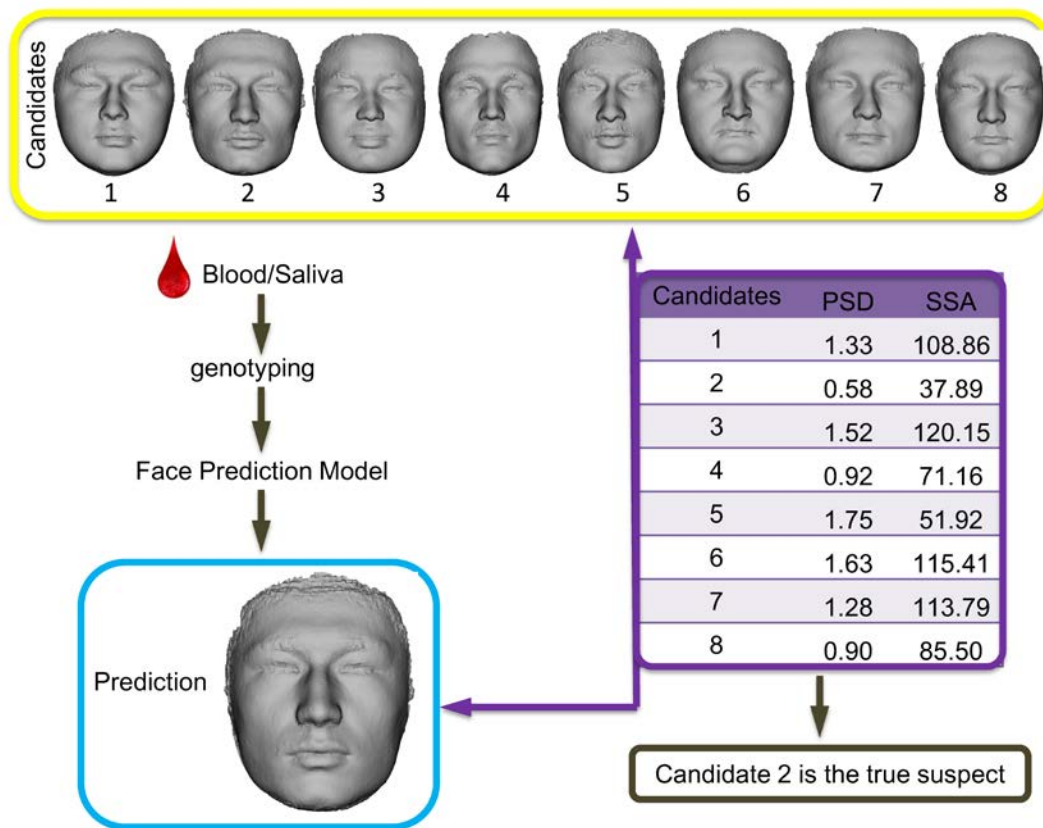

**Figure S8. The overall scheme of the forensic test.** As can be seen, a number of candidates were given and one true suspect is to be selected. A PF is determined based on the DNA information and compared to the actual 3dDFM data of the candidates and SSA is calculated. The face with minimum SSA is called as the true suspect.

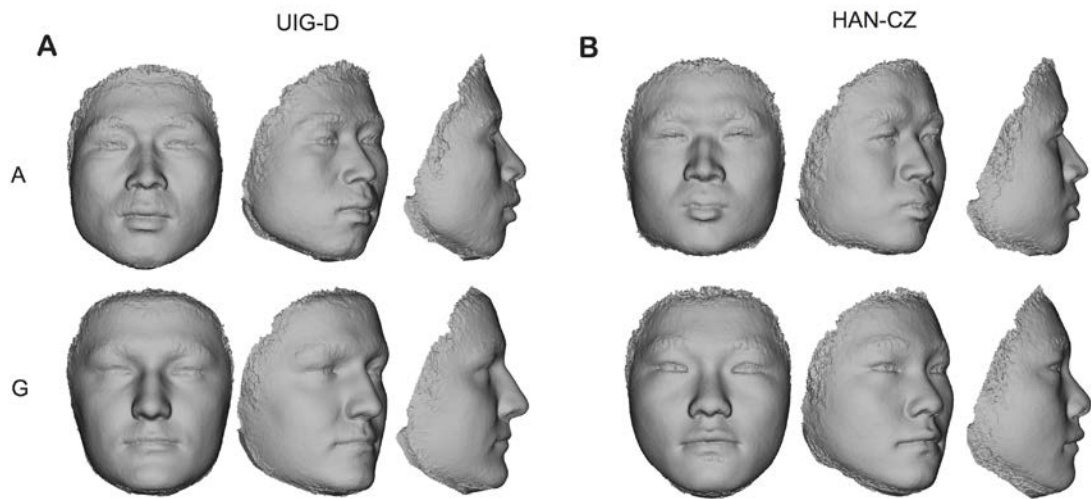

**Figure S9. Extrapolated faces of rs61672954 in discovery and independent cohorts.** (A) in UIG-D males, (B) in HAN-CZ males. We showed the extreme faces based on residual faces with their allele labeled in front. The top extrapolated faces and alleles are corresponding to Han Chinese liked faces. The bottom extrapolations are European liked faces.



## SUPPLEMENTARY TABLES

**Table S1. Facial traits defined using 3D facial landmarks**

| Face section | Features              | Quantitative definition   | Abbreviation | Measurements                                                                   |
|--------------|-----------------------|---------------------------|--------------|--------------------------------------------------------------------------------|
| Nose         | Nose wing breadth     | LAla-Prn-RAla             | LaPRa        | Distance between LAla-Prn-RAla                                                 |
|              |                       | angle LAla-Prn-RAla       | anLaPRa      | Angle between LAla-Prn-RAla                                                    |
|              |                       | LAla-RAla                 | LaRa         | Distance between LAla-RAla                                                     |
|              | Nose length           | Nsn-Prn-Sbn               | NPS          | Distance between Nsn-Prn-Sbn                                                   |
|              |                       | angle Nsn-Prn-Sbn         | anNPS        | Angle between Nsn-Prn-Sbn                                                      |
|              |                       | Prn-Nsn                   | PN           | Distance between landmarks Prn and Nsn                                         |
|              |                       | Prn-Sbn                   | PS           | Distance between landmarks Prn and Sbn                                         |
|              |                       | angle Prn-Sn-Ls           | anPSL        | Angle between Prn-Sn-Ls                                                        |
|              |                       | Nsn-Sbn                   | NS           | Distance between landmarks Nsn and Sbn                                         |
|              | Nosetip height        | height Prn-LAla-RAla      | hPLaRa       | Distance from Prn to the mid-point of a line joining landmarks LAla and RAla   |
|              |                       | height Ala                | hA           | z-coordinate mean value of LAla and RAla                                       |
|              |                       | height Prn-Ala            | hPA          | Distance from Prn to mid-point of a line joining LAla and RAla on z-coordinate |
|              |                       | height Prn                | hP           | z-coordinate mean value of Prn                                                 |
| Nasion       | Nasal root breadth    | LIntCan-Nsn-RIntCan       | LiNRi        | Distance between LIntCan-Nsn-RIntCan                                           |
|              |                       | angle LIntCan-Nsn-RIntCan | aLiNRi       | Angle between LIntCan-Nsn-RIntCan                                              |
|              | Nasal root height     | height Nsn to eyes        | hNeyes       | Perpendicular distance from Nsn to a line joining LIntCan and RIntCan          |
|              |                       | height Nsn-Prn-Sbn        | hNPS         | Perpendicular distance from Prn to a line joining Nsn and Sbn                  |
| Eyes         | Eyes length           | ExtCan-IntCan             | EI           | Mean distance between landmarks ExtCan and IntCan of left(L) and right(R)      |
|              | Outercanthal width    | LExtCan-RExtCan           | LeRe         | Distance between LExtCan and RExtCan                                           |
|              | Interorbital distance | LIntCan-RIntCan           | LiRi         | Distance between LIntCan and RIntCan                                           |

|                 |                       |                           |                                  |                                                             |
|-----------------|-----------------------|---------------------------|----------------------------------|-------------------------------------------------------------|
|                 | Antimongoloid slant   | Eyes slope                | slope                            | Angle between a line joining ExtCan-IntCan and y-coordinate |
| Mouth           | Labial fissure length | LLipCn-RLipCn             | LIRI                             | Distance between LLipCn and RLipCn                          |
|                 |                       | angle LLipCn-Stm-RLipCn   | anLISRI                          | Angle between LLipCn-Stm-RLipCn                             |
|                 |                       | angle LLipCn-ULipP-RLipCn | anLUIRI                          | Angle between LLipCn-ULipCn-RLipCn                          |
|                 | Mouth size            | Mouth perimeter           | perimeter                        | Distance between LLipCn-LLipP-RLipCn-ULipP                  |
|                 | Philtrum length       | Sbn-ULipP                 | SU                               | Distance between Sbn and ULipP                              |
|                 | Lip thickness         | ULipP-LLipP               | UL                               | Distance between ULipP and LLipP                            |
|                 |                       | angle ULipP-Stm-LLipP     | anUSL                            | Angle between ULipP-Stm-LLipP                               |
|                 |                       | ULipP-Stm-LLipP           | USL                              | Distance between ULipP-Stm-LLipP                            |
|                 |                       | angle Sbn-ULipP-Stm       | anSUS                            | Angle between Sub-ULipP-Stm                                 |
|                 |                       | angle Stm-LLipP-ChiP      | anSLIC                           | Angle between Stm-LLipP-ChiP                                |
| Sbn-ULipP-LLipP |                       | SUL                       | Distance between Sbn-ULipP-LLipP |                                                             |
|                 |                       | angle Sbn-ULipP-LLipP     | anSUL                            | Angle between Sbn-ULipP-LLipP                               |
| Chip            | Chin length           | LLipP-ChiP                | LC                               | Distance between LLipP and ChiP                             |
|                 | Lower face length     | Sbn-ULipP-ChiP            | SUC                              | Distance between Sbn-ULipP-ChiP                             |
|                 |                       | angle Sbn-ULipP-ChiP      | anSUC                            | Angle between Sbn-ULipP-ChiP                                |

**Table S2. Correlations for inter-landmark phenotypes defined using 3D facial landmarks.** Shown are Pearson correlation coefficients ( $r$ ) with color-coded based on magnitude of correlation. The lower left triangle is  $r$  tested in UIG-D females and upper right triangle in UIG-D males.

|                                  | Nose   |         |        |        |        |        |        |        |        |        |        |        |        | Nasion |        |        |        |        | Eyes   |        |        |        | Mouth     |         |                          |        |        |        |        |        |        |        | Chip   |        |        |        |
|----------------------------------|--------|---------|--------|--------|--------|--------|--------|--------|--------|--------|--------|--------|--------|--------|--------|--------|--------|--------|--------|--------|--------|--------|-----------|---------|--------------------------|--------|--------|--------|--------|--------|--------|--------|--------|--------|--------|--------|
| Quantitative definition          | LaPRa  | anLaPRa | LaRa   | NPS    | anNPS  | PN     | PS     | anPSL  | NS     | hPLaRa | hA     | hPA    | hP     | LiNRi  | aLiNRi | hNeyes | hNPS   | EI     | LeRe   | LiRi   | slope  | LIRI   | perimeter | anLISRI | anLUIRI                  | SU     | UL     | anUSL  | USL    | anSUS  | anSLIC | SUL    | anSUL  | LC     | SUC    | anSUC  |
| <b>LAla-Pm-RAla</b>              |        | -0.68   | 0.26   | 0.68   | -0.59  | 0.47   | 0.74   | -0.1   | 0.45   | 0.95   | -0.25  | 0.94   | 0.81   | 0.56   | -0.52  | 0.58   | 0.78   | 0.24   | 0.25   | 0.067  | -0.094 | 0.28   | 0.28      | -0.26   | 0.034                    | 0.038  | -0.16  | -0.089 | -0.023 | 0.078  | 0.11   | -0.12  | 0.15   | 0.12   | -0.014 | 0.28   |
| <b>angle LAla-Pm-RAla</b>        | -0.6   |         | 0.52   | -0.63  | 0.48   | -0.41  | -0.72  | -0.33  | -0.44  | -0.88  | 0.2    | -0.87  | -0.77  | -0.51  | 0.71   | -0.7   | -0.72  | -0.16  | 0.014  | 0.21   | 0.068  | 0.014  | -0.013    | 0.23    | -0.014                   | 0.0026 | 0.27   | 0.15   | 0.2    | -0.12  | -0.089 | 0.24   | -0.24  | 0.015  | 0.19   | -0.39  |
| <b>LAla-RAla</b>                 | 0.33   | 0.55    |        | -0.025 | -0.052 | 0.022  | -0.09  | -0.55  | -0.035 | -0.061 | -0.028 | -0.067 | -0.081 | -0.04  | 0.35   | -0.27  | -0.035 | 0.066  | 0.32   | 0.36   | -0.012 | 0.33   | 0.31      | 0.0068  | 0.011                    | 0.042  | 0.18   | 0.1    | 0.24   | -0.08  | 0.0026 | 0.19   | -0.16  | 0.15   | 0.24   | -0.22  |
| <b>Nsn-Pm-Sbn</b>                | 0.65   | -0.6    | -0.028 |        | -0.55  | 0.91   | 0.77   | 0.37   | 0.9    | 0.71   | 0.15   | 0.73   | 0.8    | 0.45   | -0.46  | 0.49   | 0.83   | 0.15   | 0.15   | 0.022  | -0.064 | 0.17   | 0.17      | -0.21   | 0.06                     | -0.029 | -0.17  | -0.081 | -0.034 | 0.082  | 0.13   | -0.17  | 0.14   | 0.11   | -0.061 | 0.29   |
| <b>angle Nsn-Pm-Sbn</b>          | -0.57  | 0.53    | 0.024  | -0.6   |        | -0.42  | -0.54  | -0.02  | -0.15  | -0.6   | -0.035 | -0.63  | -0.65  | -0.24  | 0.29   | -0.3   | -0.8   | -0.11  | -0.058 | 0.072  | 0.089  | -0.18  | -0.17     | 0.26    | -0.094                   | -0.021 | 0.23   | 0.031  | 0.12   | -0.064 | -0.16  | 0.19   | -0.079 | -0.056 | 0.11   | -0.21  |
| <b>Pm-Nsn</b>                    | 0.46   | -0.4    | 0.0091 | 0.92   | -0.43  |        | 0.43   | 0.38   | 0.91   | 0.49   | 0.16   | 0.51   | 0.59   | 0.24   | -0.23  | 0.26   | 0.57   | 0.062  | 0.093  | 0.042  | -0.026 | 0.17   | 0.2       | -0.18   | -0.0366×10 <sup>-4</sup> | -0.049 | -0.047 | 0.047  | 0.024  | 0.085  | -0.044 | 0.05   | 0.097  | 0.03   | 0.15   |        |
| <b>Pm-Sbn</b>                    | 0.73   | -0.71   | -0.076 | 0.79   | -0.66  | 0.48   |        | 0.21   | 0.54   | 0.8    | 0.076  | 0.78   | 0.82   | 0.59   | -0.64  | 0.68   | 0.93   | 0.24   | 0.19   | -0.018 | -0.1   | 0.12   | 0.075     | -0.17   | 0.18                     | -0.065 | -0.28  | -0.1   | -0.14  | 0.14   | 0.15   | -0.3   | 0.24   | 0.081  | -0.18  | 0.39   |
| <b>angle Pm-Sn-Ls</b>            | -0.053 | -0.45   | -0.59  | 0.44   | -0.15  | 0.45   | 0.28   |        | 0.43   | 0.076  | 0.37   | 0.079  | 0.26   | 0.11   | -0.22  | 0.2    | 0.19   | -0.003 | -0.087 | -0.12  | -0.031 | -0.12  | -0.15     | -0.035  | 0.15                     | 0.51   | -0.32  | -0.27  | -0.21  | -0.1   | 0.059  | 0.068  | 0.1    | -0.004 | 0.061  | 0.26   |
| <b>Nsn-Sbn</b>                   | 0.46   | -0.42   | -0.008 | 0.9    | -0.21  | 0.94   | 0.54   | 0.47   |        | 0.49   | 0.16   | 0.49   | 0.57   | 0.34   | -0.32  | 0.35   | 0.52   | 0.096  | 0.13   | 0.065  | -0.022 | 0.12   | 0.13      | -0.11   | -0.0069                  | -0.034 | -0.047 | -0.068 | 0.049  | 0.044  | 0.062  | -0.066 | 0.097  | 0.096  | 0.011  | 0.19   |
| <b>height Pm-LAla-RAla</b>       | 0.92   | -0.87   | -0.067 | 0.7    | -0.62  | 0.48   | 0.8    | 0.19   | 0.49   |        | -0.25  | 0.99   | 0.87   | 0.58   | -0.65  | 0.69   | 0.82   | 0.22   | 0.15   | -0.05  | -0.091 | 0.17   | 0.19      | -0.27   | 0.028                    | 0.024  | -0.22  | -0.12  | -0.1   | 0.1    | 0.11   | -0.18  | 0.2    | 0.068  | -0.095 | 0.35   |
| <b>height Ala</b>                | -0.089 | 0.061   | -0.027 | 0.3    | -0.21  | 0.26   | 0.24   | 0.34   | 0.25   | -0.087 |        | -0.24  | 0.25   | 0.21   | -0.098 | 0.14   | 0.083  | 0.059  | 0.14   | 0.16   | -0.02  | 0.12   | 0.12      | -0.093  | -0.1                     | 0.07   | -0.049 | -0.014 | -0.068 | 0.0094 | 0.13   | 0.0046 | -0.03  | -0.075 | -0.032 | 0.11   |
| <b>height Pm-Ala</b>             | 0.9    | -0.86   | -0.079 | 0.73   | -0.66  | 0.53   | 0.79   | 0.2    | 0.51   | 0.99   | -0.07  |        | 0.88   | 0.58   | -0.66  | 0.69   | 0.83   | 0.22   | 0.14   | -0.063 | -0.087 | 0.19   | 0.21      | -0.3    | 0.047                    | -0.008 | -0.25  | -0.12  | -0.12  | 0.12   | 0.14   | -0.23  | 0.21   | 0.067  | -0.13  | 0.38   |
| <b>height Pm</b>                 | 0.77   | -0.75   | -0.084 | 0.81   | -0.7   | 0.61   | 0.84   | 0.36   | 0.58   | 0.85   | 0.44   | 0.87   |        | 0.69   | -0.71  | 0.76   | 0.87   | 0.25   | 0.21   | 0.014  | -0.097 | 0.25   | 0.27      | -0.34   | -0.0038                  | 0.027  | -0.27  | -0.13  | -0.15  | 0.12   | 0.12   | -0.22  | 0.2    | 0.03   | -0.14  | 0.43   |
| <b>LIntCan-Nsn-RIntCan</b>       | 0.42   | -0.36   | 0.0042 | 0.37   | -0.22  | 0.21   | 0.48   | 0.12   | 0.28   | 0.44   | 0.35   | 0.44   | 0.57   |        | -0.66  | 0.83   | 0.51   | 0.12   | 0.45   | 0.47   | -0.088 | 0.23   | 0.21      | -0.23   | 0.054                    | 0.051  | -0.22  | -0.097 | -0.12  | 0.084  | 0.17   | -0.16  | 0.16   | 0.037  | -0.093 | 0.34   |
| <b>angle LIntCan-Nsn-RIntCan</b> | -0.44  | 0.66    | 0.33   | -0.48  | 0.41   | -0.29  | -0.61  | -0.31  | -0.32  | -0.6   | -0.27  | -0.62  | -0.7   | -0.54  |        | -0.96  | -0.56  | -0.18  | 0.082  | 0.34   | 0.11   | -0.051 | -0.034    | 0.26    | -0.09                    | 0.036  | 0.36   | 0.14   | 0.29   | -0.13  | -0.22  | 0.35   | -0.23  | 0.062  | 0.3    | -0.47  |
| <b>height Nsn to eyes</b>        | 0.48   | -0.64   | -0.27  | 0.5    | -0.39  | 0.29   | 0.64   | 0.28   | 0.34   | 0.62   | 0.32   | 0.64   | 0.74   | 0.74   | -0.96  |        | 0.6    | 0.17   | 0.088  | -0.094 | -0.11  | 0.12   | 0.097     | -0.27   | 0.085                    | -0.008 | -0.35  | -0.14  | -0.26  | 0.12   | 0.22   | -0.32  | 0.22   | -0.034 | -0.26  | 0.47   |
| <b>height Nsn-Pm-Sbn</b>         | 0.74   | -0.7    | -0.057 | 0.84   | -0.86  | 0.58   | 0.94   | 0.28   | 0.53   | 0.8    | 0.27   | 0.82   | 0.87   | 0.41   | -0.58  | 0.59   |        | 0.21   | 0.16   | -0.034 | -0.1   | 0.17   | 0.14      | -0.24   | 0.15                     | -0.032 | -0.29  | -0.088 | -0.14  | 0.12   | 0.17   | -0.28  | 0.19   | 0.087  | -0.16  | 0.37   |
| <b>ExtCan-IntCan</b>             | 0.25   | -0.18   | 0.042  | 0.17   | -0.12  | 0.11   | 0.21   | 0.019  | 0.13   | 0.24   | 0.061  | 0.23   | 0.24   | 0.017  | -0.1   | 0.088  | 0.19   |        | 0.68   | -0.084 | -0.064 | 0.15   | 0.12      | -0.051  | 0.055                    | 0.044  | -0.075 | -0.043 | -0.011 | -0.003 | 0.053  | -0.037 | -6E-04 | 0.053  | 0.007  | 0.078  |
| <b>LExtCan-RExtCan</b>           | 0.26   | -0.017  | 0.25   | 0.14   | -0.035 | 0.087  | 0.17   | -0.078 | 0.13   | 0.17   | 0.15   | 0.15   | 0.21   | 0.49   | 0.08   | 0.087  | 0.13   | 0.71   |        | 0.65   | -0.053 | 0.27   | 0.25      | -0.029  | 0.0074                   | 0.11   | 0.059  | 0.01   | 0.14   | -0.038 | 0.03   | 0.13   | -0.054 | 0.12   | 0.18   | -0.033 |
| <b>LIntCan-RIntCan</b>           | 0.06   | 0.22    | 0.32   | -0.026 | 0.14   | -0.015 | -0.033 | -0.15  | 0.036  | -0.071 | 0.15   | -0.088 | -0.003 | 0.63   | 0.3    | -0.045 | -0.079 | -0.086 | 0.63   |        | 0.011  | 0.2    | 0.2       | 0.018   | -0.061                   | 0.1    | 0.17   | 0.062  | 0.2    | -0.058 | -0.029 | 0.23   | -0.087 | 0.097  | 0.24   | -0.15  |
| <b>Eyes slope</b>                | -0.079 | 0.093   | 0.03   | -0.046 | 0.1    | 0.014  | -0.12  | -0.006 | 0.013  | -0.095 | -0.049 | -0.097 | -0.11  | -0.11  | 0.18   | -0.18  | -0.12  | -0.066 | -0.036 | 0.039  |        | -0.039 | -0.027    | 0.051   | -0.04                    | -0.044 | 0.067  | 0.0063 | 0.044  | -0.021 | -0.022 | 0.03   | -0.037 | -0.013 | 0.014  | -0.04  |
| <b>LLipCn-RLipCn</b>             | 0.23   | 0.088   | 0.34   | 0.13   | -0.081 | 0.17   | 0.012  | -0.088 | 0.13   | 0.095  | 0.17   | 0.12   | 0.19   | 0.23   | -0.03  | 0.093  | 0.062  | 0.11   | 0.25   | 0.23   | -0.02  |        | 0.94      | -0.36   | 0.2                      | 0.01   | 0.077  | 0.093  | 0.18   | 0.13   | -0.006 | 0.076  | 0.12   | 0.2    | 0.18   | 0.048  |
| <b>Mouth perimeter</b>           | 0.24   | 0.045   | 0.3    | 0.14   | -0.082 | 0.2    | -0.007 | -0.1   | 0.14   | 0.13   | 0.17   | 0.15   | 0.22   | 0.23   | -0.043 | 0.1    | 0.054  | 0.093  | 0.23   | 0.22   | -0.008 | 0.94   |           | -0.46   | -0.081                   | -0.027 | 0.28   | 0.12   | 0.35   | 0.13   | -0.11  | 0.23   | 0.09   | 0.23   | 0.31   | -0.061 |
| <b>angle LLipCn-Stm-RLipCn</b>   | -0.19  | 0.16    | -0.002 | -0.19  | 0.21   | -0.21  | -0.09  | -0.084 | -0.13  | -0.2   | -0.14  | -0.24  | -0.28  | -0.17  | 0.23   | -0.23  | -0.17  | -0.038 | -0.022 | 0.02   | 0.026  | -0.32  | -0.43     |         | 0.11                     | 0.013  | 0.21   | -0.48  | 0.1    | -0.37  | -0.36  | 0.2    | -0.14  | -0.18  | 0.043  | -0.15  |
| <b>angle LLipCn-ULipP-RLipCn</b> | -0.008 | 0.071   | 0.075  | 0.047  | -0.05  | 0.0086 | 0.091  | 0.12   | 0.023  | -0.041 | -0.051 | -0.006 | -0.03  | -0.008 | 0.0057 | -0.005 | 0.077  | 0.029  | 0.024  | -0.012 | -0.023 | 0.28   | -0.0049   | 0.12    |                          | 0.12   | -0.58  | -0.094 | -0.46  | 0.2    | 0.12   | -0.44  | 0.41   | 0.0014 | -0.34  | 0.46   |
| <b>Sbn-ULipP</b>                 | 0.031  | -0.0092 | 0.021  | -0.079 | 0.04   | -0.042 | -0.11  | 0.45   | -0.063 | 0.024  | 0.03   | -0.025 | -0.008 | 0.049  | 0.057  | -0.032 | -0.088 | 0.034  | 0.11   | 0.11   | 0.059  | 0.085  | 0.053     | -0.016  | 0.1                      |        | -0.23  | -0.32  | -0.058 | -0.39  | -0.015 | 0.48   | -0.18  | 0.11   | 0.46   | -0.069 |
| <b>ULipP-LLipP</b>               | -0.081 | 0.21    | 0.17   | -0.16  | 0.24   | -0.091 | -0.22  | -0.29  | -0.064 | -0.16  | -0.085 | -0.21  | -0.23  | -0.083 | 0.29   | -0.26  | -0.25  | -0.025 | 0.097  | 0.19   | 0.058  | 0.088  | 0.26      | 0.25    | -0.51                    | -0.13  |        | 0.3    | 0.69   | 0.079  | -0.36  | 0.74   | -0.1   | -0.049 | 0.52   | -0.49  |
| <b>angle ULipP-Stm-LLipP</b>     | -0.039 | 0.13    | 0.12   | -0.049 | 0.022  | -0.019 | -0.078 | -0.15  | -0.04  | -0.089 | -9E-04 | -0.089 | -0.081 | -0.027 | 0.095  | -0.085 | -0.06  | -0.015 | 0.029  | 0.065  | 0.011  | 0.097  | 0.1       | -0.55   | 0.018                    | -0.15  | 0.16   |        | 0.086  | 0.65   | 0.44   | 0.042  | 0.095  | -0.032 | 0.0028 | -0.082 |
| <b>ULipP-Stm-LLipP</b>           | -0.004 | 0.17    | 0.2    | -0.055 | 0.17   | 0.0069 | -0.13  | -0.2   | 0.03   | -0.087 | -0.11  | -0.13  | -0.17  | -0.043 | 0.28   | -0.24  | -0.15  | 0.0034 | 0.15   | 0.22   | 0.053  | 0.15   | 0.28      | 0.15    | -0.39                    | -0.001 | 0.66   | -0.002 |        | 0.028  | -0.31  | 0.58   | -0.018 | 0.66   | 0.85   | -0.3   |
| <b>angle Sbn-ULipP-Stm</b>       | 0.0051 | -0.006  | -0.001 | 0.039  | 0.034  | 0.035  | 0.031  | -0.012 | 0.055  | 0.0057 | 0.043  | 0.025  | 0.045  | 0.052  | -0.051 | 0.056  | 0.011  | -0.008 | 0.017  | 0.022  | 0.0055 | 0.14   | 0.11      | -0.41   | 0.29                     | -0.24  | -0.007 | 0.69   | -0.044 |        | 0.17   | -0.2   | 0.77   | 0.1    | -0.11  | 0.54   |
| <b>angle Stm-LLipP-ChiP</b>      | 0.12   | -0.098  | 0.011  | 0.17   | -0.23  | 0.12   | 0.18   | 0.14   | 0.083  | 0.12   | 0.22   | 0.15   | 0.25   | 0.17   | -0.23  | 0.24   | 0.22   | 0.043  | 0.045  | -0.01  | -0.056 | 0.039  | -0.061    | -0.4    | 0.16                     | 0.033  | -0.36  | 0.53   | -0.33  | 0.29   |        | -0.34  | -0.14  | -0.11  | -0.28  | 0.37   |
| <b>Sbn-ULipP-LLipP</b>           | -0.047 | 0.17    | 0.16   | -0.19  | 0.23   | -0.1   | -0.26  | 0.053  | -0.095 | -0.11  | -0.052 | -0.19  | -0.2   | -0.037 | 0.28   | -0.24  | -0.27  | 0.0017 | 0.15   | 0.23   | 0.088  | 0.13   | 0.25      | 0.19    | -0.36                    | 0.56   | 0.75   | 0.039  | 0.55   | -0.17  | -0.28  |        | -0.21  | 0.032  | 0.78   | -0.49  |
| <b>angle Sbn-ULipP-LLipP</b>     | 0.042  | -0.12   | -0.099 | 0.097  | 0.033  | 0.069  | 0.11   | 0.14   | 0.12   | 0.083  | 0.023  | 0.11   | 0.11   | 0.093  | -0.13  | 0.14   | 0.063  | 0.01   | 0.0092 | -0.016 | -0.006 | 0.15   | 0.11      | -0.11   | 0.46                     | -0.15  | -0.13  | 0.06   | -0.053 | 0.73   | -0.11  |        |        | 0.17   | -0.077 | 0.73   |
| <b>LLipP-ChiP</b>                | 0.045  | 0.057   | 0.11   | 0.05   | 0.03   | 0.072  | -0.002 | -0.024 | 0.079  | -0.002 | -0.12  | -0.007 | -0.066 | -0.015 | 0.15   | -0.13  | -0.004 | 0.022  | 0.11   |        |        |        |           |         |                          |        |        |        |        |        |        |        |        |        |        |        |

**Table S3. Divergence of landmark based ancestry-divergent phenotypes.** The *P* values are measured by Students' test between EUR and HAN-TZ.

| Ancestry-divergent phenotypes based on landmark | <i>P</i>            |                     |
|-------------------------------------------------|---------------------|---------------------|
|                                                 | Female              | Male                |
| LAla-Prn-RAla                                   | $3 \times 10^{-11}$ | $2 \times 10^{-21}$ |
| Nsn-Prn-Sbn                                     | $2 \times 10^{-15}$ | $7 \times 10^{-23}$ |
| height Prn-Ala                                  | $1 \times 10^{-18}$ | $2 \times 10^{-31}$ |
| LIntCan-Nsn-RIntCan                             | $2 \times 10^{-10}$ | $5 \times 10^{-27}$ |
| height Nsn to eyes                              | $1 \times 10^{-21}$ | $6 \times 10^{-47}$ |
| ExtCan-IntCan                                   | $1 \times 10^{-7}$  | $3 \times 10^{-10}$ |
| LIntCan-RIntCan                                 | $9 \times 10^{-7}$  | $4 \times 10^{-9}$  |
| LLipCn-RLipCn                                   | $5 \times 10^{-3}$  | $2 \times 10^{-8}$  |
| ULipP-Stm-LLipP                                 | $3 \times 10^{-3}$  | $7 \times 10^{-9}$  |
| Sbn-ULipP-ChiP                                  | $4 \times 10^{-3}$  | $7 \times 10^{-7}$  |

**Table S4. Divergence of PCA based and PLS based ancestry-divergent phenotypes.**

| Partial Features | Gender <sup>a</sup> | PCA based           |                       | PLS based           |                       |
|------------------|---------------------|---------------------|-----------------------|---------------------|-----------------------|
|                  |                     | ncomp. <sup>b</sup> | <i>P</i> <sup>c</sup> | ncomp. <sup>b</sup> | <i>P</i> <sup>c</sup> |
| brow ridge       | Female              | 2                   | $6 \times 10^{-19}$   | 1:6                 | $6 \times 10^{-23}$   |
|                  | Male                | 2                   | $1 \times 10^{-29}$   | 1:8                 | $3 \times 10^{-49}$   |
| eyes             | Female              | 5                   | $2 \times 10^{-16}$   | 1:8                 | $1 \times 10^{-25}$   |
|                  | Male                | 2                   | $9 \times 10^{-17}$   | 1:11                | $1 \times 10^{-60}$   |
| side faces       | Female              | 1                   | $6 \times 10^{-13}$   | 1:25                | $6 \times 10^{-27}$   |
|                  | Male                | 2                   | $2 \times 10^{-17}$   | 1:9                 | $2 \times 10^{-47}$   |
| cheeks           | Female              | 1                   | $5 \times 10^{-15}$   | 1:22                | $1 \times 10^{-27}$   |
|                  | Male                | 2                   | $6 \times 10^{-21}$   | 1:8                 | $4 \times 10^{-43}$   |
| nose             | Female              | 2                   | $1 \times 10^{-22}$   | 1:17                | $3 \times 10^{-29}$   |
|                  | Male                | 2                   | $2 \times 10^{-46}$   | 1:12                | $6 \times 10^{-57}$   |
| mouth            | Female              | 4                   | $3 \times 10^{-11}$   | 1:20                | $2 \times 10^{-24}$   |
|                  | Male                | 2                   | $9 \times 10^{-18}$   | 1:15                | $2 \times 10^{-48}$   |

<sup>a</sup>sex specified test<sup>b</sup>Number of components that used to distinguish Han Chinese and European features<sup>c</sup>Student's test

**Table S5. Detailed information about quality control.** Here summarized the number of SNPs

and samples omitted and retained for each quality filter.

| Platform                                           | UIG-D                    |                   | UIG-R                                      |                   |
|----------------------------------------------------|--------------------------|-------------------|--------------------------------------------|-------------------|
|                                                    | Illumina Omni Zhonghua-8 |                   | Affymetrix Genome-Wide Human SNP Array 6.0 |                   |
|                                                    | Number of SNPs           | Number of samples | Number of SNPs                             | Number of samples |
| <b>Before QC</b>                                   | 894,956                  | 726               | 934,968                                    | 192               |
| <b>Mitochondria SNPs</b>                           | 147                      | 726               | 411                                        | 192               |
| <b>Meaningless SNPs</b>                            | 1,880                    | 726               | 1,846                                      | 192               |
| <b>MAF &lt;0.01</b>                                | 41,988                   | 726               | 127,717                                    | 192               |
| <b>Missing rate per SNP &gt;90%</b>                | 1,544                    | 726               | 66,295                                     | 192               |
| <b>HWE p-value &lt;10<sup>-6</sup></b>             | 487                      | 726               | 3,652                                      | 192               |
| <b>Positional duplicates</b>                       | 2,541                    | 726               | 2,947                                      | 192               |
| <b>Uyghur Ancestry outliers</b>                    | 847,046                  | 3                 | 758,453                                    | 0                 |
| <b>Missing rate per person &gt;10%</b>             | 847,046                  | 1                 | 758,453                                    | 0                 |
| <b>Pairwise IBD estimation</b>                     | 847,046                  | 0                 | 758,453                                    | 12                |
| <b>Inbreeding coefficients &gt;0.2 or &lt;-0.2</b> | 847,046                  | 0                 | 758,453                                    | 0                 |
| <b>Sex check</b>                                   | 847,046                  | 0                 | 758,453                                    | 0                 |
| <b>defecive 3D images</b>                          | 847,046                  | 28                | 758,453                                    | 9                 |
| <b>After QC</b>                                    | 847,046                  | 694               | 758,453                                    | 171               |

**Table S6. Inflation factors of six significant ancestry-divergent phenotypic GWAS.**

Genome-wide association tests using multivariate linear regression were applied, as implemented in PLINK, taking an additive linear regression model adjusting for the first four genetic principal components (gPCs) of UIG-D which were decomposed using EIGENSTRAT.

| <b>SNP</b>  | <b>P</b>            | <b>Inflation factor</b> | <b>gPCs corrected P values</b> | <b>gPCs corrected Inflation factors</b> |
|-------------|---------------------|-------------------------|--------------------------------|-----------------------------------------|
| rs1868752   | $1 \times 10^{-10}$ | 1                       | $1 \times 10^{-10}$            | 1                                       |
| rs118078182 | $8 \times 10^{-9}$  | 1.01                    | $1 \times 10^{-8}$             | 1.01                                    |
| rs60159418  | $9 \times 10^{-11}$ | 1.01                    | $1 \times 10^{-9}$             | 1                                       |
| rs17868256  | $7 \times 10^{-9}$  | 1.04                    | $1 \times 10^{-7}$             | 1.01                                    |
| rs3920540   | $3 \times 10^{-8}$  | 1.06                    | $2 \times 10^{-7}$             | 1.02                                    |
| rs61672954  | $2 \times 10^{-8}$  | 1.04                    | $1 \times 10^{-7}$             | 1                                       |

**Table S7. Correlations for all ancestry-divergent phenotypes.** Shown are Pearson correlation coefficients ( $r$ ) with color-coded based on magnitude of correlation. The lower left triangle is  $r$  tested in UIG-D females and upper right triangle in UIG-D

males.

|                |                     | Landmark based ancestry-divergent phenotypes |        |        |        |        |        |        |        |        | PCA based ancestry-divergent phenotypes |        |        |        |        |        | PLS based ancestry-divergent phenotypes |        |        |        |        |        |        |
|----------------|---------------------|----------------------------------------------|--------|--------|--------|--------|--------|--------|--------|--------|-----------------------------------------|--------|--------|--------|--------|--------|-----------------------------------------|--------|--------|--------|--------|--------|--------|
|                |                     | LaPRa                                        | NPS    | hPA    | LiNRi  | hNeyes | EI     | LiRi   | LIRI   | USL    | SUC                                     | B.sPC  | E.sPC  | S.sPC  | C.sPC  | N.sPC  | M.sPC                                   | B.sPLS | E.sPLS | S.sPLS | C.sPLS | N.sPLS | M.sPLS |
| Landmark based | LAla-Prn-RAIa       |                                              | 0.6    | 0.94   | 0.39   | 0.33   | 0.0014 | 0.23   | 0.29   | 0.23   | 0.19                                    | -0.039 | 0.0046 | 0.16   | -0.11  | -0.4   | 0.082                                   | -0.22  | -0.13  | 0.011  | 0.093  | -0.31  | -0.053 |
|                | Nsn-Prn-Sbn         | 0.56                                         |        | 0.63   | 0.26   | 0.24   | -0.043 | 0.14   | 0.19   | 0.12   | 0.051                                   | -0.043 | 0.14   | 0.37   | 0.002  | -0.003 | 0.062                                   | -0.01  | -0.014 | -0.038 | -0.015 | -0.29  | -0.17  |
|                | height Prn-Ala      | 0.91                                         | 0.62   |        | 0.39   | 0.41   | -0.035 | 0.13   | 0.2    | 0.18   | 0.1                                     | -0.12  | -0.046 | 0.11   | -0.18  | -0.51  | 0.059                                   | -0.28  | -0.22  | -0.055 | 0.023  | -0.43  | -0.2   |
|                | LIntCan-Nsn-RIntCan | 0.34                                         | 0.21   | 0.34   |        | 0.79   | -0.016 | 0.66   | 0.14   | 0.08   | 0.077                                   | -0.013 | 0.084  | 0.17   | 0.11   | -0.5   | 0.028                                   | -0.41  | -0.28  | -0.002 | 0.041  | -0.35  | -0.18  |
|                | height Nsn to eyes  | 0.32                                         | 0.23   | 0.42   | 0.73   |        | -0.026 | 0.069  | 0.01   | -0.024 | -0.083                                  | -0.35  | -0.18  | 0.079  | 0.026  | -0.69  | -0.062                                  | -0.59  | -0.51  | -0.13  | -0.16  | -0.54  | -0.21  |
|                | ExtCan-IntCan       | 0.2                                          | 0.12   | 0.14   | 0.0093 | -0.046 |        | -0.002 | 0.04   | 0.01   | 0.029                                   | 0.2    | -0.59  | 0.1    | 0.21   | 0.061  | -0.007                                  | -0.1   | -0.18  | -0.18  | -0.027 | -0.11  | 0.073  |
|                | LIntCan-RIntCan     | 0.2                                          | 0.1    | 0.11   | 0.78   | 0.14   | 0.059  |        | 0.22   | 0.16   | 0.22                                    | 0.41   | 0.36   | 0.18   | 0.15   | 0.024  | 0.12                                    | 0.057  | 0.17   | 0.16   | 0.25   | 0.093  | -0.036 |
|                | LLipCn-RLipCn       | 0.25                                         | 0.17   | 0.17   | 0.27   | 0.13   | 0.15   | 0.28   |        | 0.22   | 0.22                                    | 0.096  | 0.13   | 0.26   | 0.18   | 0.016  | -0.13                                   | 0.068  | 0.086  | -0.14  | -0.033 | -0.007 | -0.049 |
|                | ULipP-Stm-LLipP     | 0.054                                        | 0.047  | -0.008 | 0.059  | -0.1   | -0.008 | 0.18   | 0.19   |        | 0.83                                    | 0.093  | 0.078  | 0.2    | -0.092 | 0.14   | 0.76                                    | 0.037  | 0.15   | 0.17   | 0.12   | 0.095  | 0.24   |
|                | Sbn-ULipP-ChiP      | 0.056                                        | -0.054 | -0.033 | 0.057  | -0.13  | -0.02  | 0.2    | 0.22   | 0.82   |                                         | 0.16   | 0.08   | 0.33   | -0.033 | 0.24   | 0.79                                    | 0.11   | 0.19   | 0.18   | 0.15   | 0.13   | 0.22   |
|                | PCA based           | BrowRidge.sPC                                | -0.039 | 0.061  | -0.097 | -0.13  | -0.41  | -0.05  | 0.19   | 0.026  | 0.27                                    | 0.23   |        | 0.19   | -0.17  | -0.087 | 0.4                                     | 0.086  | 0.57   | 0.49   | 0.14   | 0.29   | 0.35   |
| eyes.sPC       |                     | 0.097                                        | 0.025  | 0.18   | 0.024  | 0.21   | 0.42   | -0.15  | -0.058 | -0.024 | -0.074                                  | -0.37  |        | -0.086 | -0.16  | 0.27   | 0.095                                   | 0.51   | 0.43   | 0.45   | 0.4    | 0.34   | 0.073  |
| SideFace.sPC   |                     | 0.28                                         | 0.19   | 0.081  | 0.33   | -0.03  | 0.44   | 0.51   | 0.56   | 0.3    | 0.32                                    | 0.33   | -0.17  |        | 0.66   | 0.17   | 0.24                                    | -0.15  | -0.069 | -0.25  | -0.43  | -0.12  | -0.041 |
| cheeks.sPC     |                     | 0.24                                         | 0.16   | 0.052  | 0.33   | -0.02  | 0.41   | 0.5    | 0.45   | 0.28   | 0.28                                    | 0.36   | -0.18  | 0.97   |        | 0.073  | -0.095                                  | -0.2   | -0.11  | -0.38  | -0.48  | -0.1   | -0.1   |
| nose.sPC       |                     | -0.43                                        | -0.27  | -0.62  | -0.47  | -0.79  | 0.054  | 0.034  | -0.013 | 0.21   | 0.26                                    | 0.46   | -0.35  | 0.28   | 0.26   |        | 0.19                                    | 0.63   | 0.58   | 0.26   | 0.23   | 0.57   | 0.33   |
| mouth.sPC      |                     | 0.052                                        | -0.076 | -0.067 | 0.067  | 0.0035 | 0.098  | 0.093  | 0.024  | -0.2   | -0.18                                   | 0.065  | -0.044 | 0.26   | 0.3    | 0.082  |                                         | 0.078  | 0.14   | 0.28   | 0.2    | 0.12   | 0.25   |
| BrowRidge.sPLS |                     | -0.18                                        | -0.073 | -0.25  | -0.38  | -0.63  | -0.098 | 0.02   | -0.059 | 0.17   | 0.15                                    | 0.66   | -0.38  | 0.16   | 0.18   | 0.62   | 0.076                                   |        | 0.61   | 0.27   | 0.27   | 0.57   | 0.26   |
| PLS based      | eyes.sPLS           | -0.18                                        | -0.12  | -0.29  | -0.29  | -0.52  | -0.23  | 0.054  | 0.054  | 0.13   | 0.18                                    | 0.46   | -0.47  | 0.16   | 0.15   | 0.57   | 0.044                                   | 0.63   |        | 0.37   | 0.31   | 0.66   | 0.22   |
|                | SideFace.sPLS       | 0.028                                        | -0.16  | -0.12  | -0.12  | -0.26  | -0.15  | 0.058  | -0.037 | -0.014 | 0.04                                    | 0.27   | -0.45  | 0.24   | 0.26   | 0.43   | 0.3                                     | 0.33   | 0.41   |        | 0.76   | 0.34   | 0.3    |
|                | cheeks.sPLS         | 0.052                                        | -0.19  | -0.096 | -0.14  | -0.32  | -0.12  | 0.086  | -0.054 | 0.026  | 0.073                                   | 0.3    | -0.42  | 0.22   | 0.25   | 0.43   | 0.25                                    | 0.4    | 0.43   | 0.84   |        | 0.29   | 0.21   |
|                | nose.sPLS           | -0.26                                        | -0.19  | -0.42  | -0.42  | -0.67  | -0.063 | 0.0068 | -0.1   | 0.11   | 0.15                                    | 0.4    | -0.32  | 0.11   | 0.12   | 0.75   | 0.16                                    | 0.67   | 0.7    | 0.45   | 0.5    |        | 0.35   |
|                | mouth.sPLS          | -0.049                                       | -0.21  | -0.23  | -0.12  | -0.3   | 0.082  | 0.098  | -0.068 | 0.15   | 0.15                                    | 0.23   | -0.2   | 0.24   | 0.25   | 0.4    | 0.3                                     | 0.25   | 0.23   | 0.37   | 0.39   | 0.4    |        |



**Table S8. Benjamini-Hochberg procedure as multiple testing correction.** After multiple testing correction, there were 39 significant SNPs with adjusted  $P < 0.05$  corresponding to 4 index SNPs (in bold) reported associated regions in Table 2.

| Chr.      | SNP                | Gender        | Trait                | P value         | Adjusted P      |
|-----------|--------------------|---------------|----------------------|-----------------|-----------------|
| <b>2</b>  | <b>rs17868256</b>  | <b>female</b> | <b>Cheek sPLS</b>    | <b>7.00E-09</b> | <b>4.90E-02</b> |
| <b>4</b>  | <b>rs60159418</b>  | <b>male</b>   | <b>Mouth sPC</b>     | <b>9.00E-11</b> | <b>3.30E-03</b> |
| 4         | rs60159418         | male          | Mouth sPC            | 1.00E-09        | 1.80E-02        |
| 4         | rs56271018         | male          | Mouth sPC            | 2.00E-09        | 2.60E-02        |
| 4         | rs16884372         | male          | Mouth sPC            | 3.00E-09        | 3.20E-02        |
| 4         | rs11937565         | male          | Mouth sPC            | 3.00E-09        | 3.20E-02        |
| 4         | rs11945187         | male          | Mouth sPC            | 3.00E-09        | 3.20E-02        |
| 4         | rs16867997         | male          | Mouth sPC            | 3.00E-09        | 3.20E-02        |
| 4         | rs16884388         | male          | Mouth sPC            | 3.00E-09        | 3.20E-02        |
| 4         | rs12507539         | male          | Mouth sPC            | 3.00E-09        | 3.20E-02        |
| <b>5</b>  | <b>rs118078182</b> | <b>mixed</b>  | <b>Nsn-Prn-Sbn</b>   | <b>8.00E-09</b> | <b>5.00E-02</b> |
| 11        | rs34639545         | mixed         | ExtCan-IntCan        | 6.00E-11        | 2.20E-03        |
| <b>11</b> | <b>rs1868752</b>   | <b>mixed</b>  | <b>ExtCan-IntCan</b> | <b>1.00E-10</b> | <b>3.30E-03</b> |
| 11        | rs150546335        | mixed         | ExtCan-IntCan        | 1.00E-10        | 4.80E-03        |
| 11        | rs117799641        | mixed         | ExtCan-IntCan        | 1.00E-10        | 4.80E-03        |
| 11        | rs1975637          | mixed         | ExtCan-IntCan        | 1.00E-10        | 4.80E-03        |
| 11        | rs964662           | mixed         | ExtCan-IntCan        | 1.00E-10        | 4.80E-03        |
| 11        | rs56699489         | mixed         | ExtCan-IntCan        | 1.00E-10        | 4.80E-03        |
| 11        | rs58390872         | mixed         | ExtCan-IntCan        | 1.00E-10        | 4.80E-03        |
| 11        | rs78156770         | mixed         | ExtCan-IntCan        | 1.00E-10        | 4.80E-03        |
| 11        | rs34143639         | mixed         | ExtCan-IntCan        | 1.00E-10        | 4.80E-03        |
| 11        | rs11822267         | mixed         | ExtCan-IntCan        | 1.00E-10        | 4.80E-03        |
| 11        | rs74483984         | mixed         | ExtCan-IntCan        | 1.00E-10        | 4.80E-03        |
| 11        | rs56656319         | mixed         | ExtCan-IntCan        | 1.00E-10        | 4.80E-03        |
| 11        | rs79259187         | mixed         | ExtCan-IntCan        | 1.00E-10        | 4.80E-03        |
| 11        | rs11826493         | mixed         | ExtCan-IntCan        | 1.00E-10        | 4.80E-03        |
| 11        | rs61141574         | mixed         | ExtCan-IntCan        | 1.00E-10        | 4.80E-03        |
| 11        | rs11823815         | mixed         | ExtCan-IntCan        | 1.00E-10        | 4.80E-03        |
| 11        | rs115392245        | mixed         | ExtCan-IntCan        | 1.00E-10        | 4.80E-03        |
| 11        | rs147681613        | mixed         | ExtCan-IntCan        | 1.00E-10        | 4.80E-03        |
| 11        | rs57524079         | mixed         | ExtCan-IntCan        | 1.00E-10        | 4.80E-03        |
| 11        | rs78206044         | mixed         | ExtCan-IntCan        | 1.00E-10        | 4.90E-03        |
| 11        | rs56048952         | mixed         | ExtCan-IntCan        | 1.00E-10        | 5.00E-03        |

|    |             |       |               |          |          |
|----|-------------|-------|---------------|----------|----------|
| 11 | rs77420038  | mixed | ExtCan-IntCan | 1.00E-10 | 5.00E-03 |
| 11 | rs184981564 | mixed | ExtCan-IntCan | 1.00E-10 | 5.00E-03 |
| 11 | rs144478480 | mixed | ExtCan-IntCan | 1.00E-10 | 5.00E-03 |
| 11 | rs144514908 | mixed | ExtCan-IntCan | 1.00E-10 | 5.00E-03 |
| 11 | rs144189728 | mixed | ExtCan-IntCan | 1.00E-10 | 5.00E-03 |
| 11 | rs148657983 | mixed | ExtCan-IntCan | 1.00E-10 | 5.00E-03 |
| 11 | rs1868754   | mixed | ExtCan-IntCan | 2.00E-10 | 7.20E-03 |

**Table S9. Sample size of each genotype per SNP in studied cohorts.** Shown are six index SNPs in the corresponding discovered gender groups. We used one criterion to eliminate the interference from small sample size that we only considered sample size with individuals carrying minor allele (homozygote\*2 + heterozygote\*1) larger than 10 which number was enough to guarantee a stable average face. The black genotypes set presented below illustrate studied groups used to discover or replicate the index SNPs.

|                    |        | UIG-D |     |     | UIG-R |    |     | HAN-CZ |     |      |
|--------------------|--------|-------|-----|-----|-------|----|-----|--------|-----|------|
|                    |        | GG    | TG  | TT  | GG    | TG | TT  | GG     | TG  | TT   |
| <b>rs1868752</b>   | Female | 1     | 14  | 423 | 0     | 4  | 112 | 3      | 110 | 3091 |
|                    | Male   | 0     | 7   | 279 | 0     | 1  | 66  | 0      | 37  | 450  |
| <b>rs118078182</b> |        | AA    | GA  | GG  | AA    | GA | GG  | AA     | GA  | GG   |
|                    | Female | 5     | 72  | 361 | 1     | 8  | 83  | 42     | 364 | 797  |
|                    | Male   | 3     | 43  | 240 | 1     | 7  | 51  | 19     | 146 | 321  |
| <b>rs60159418</b>  |        | AA    | GA  | GG  | AA    | GA | GG  | AA     | GA  | GG   |
|                    | Male   | 39    | 127 | 120 | 7     | 24 | 31  | 251    | 201 | 30   |
| <b>rs17868256</b>  |        | AA    | GA  | GG  | AA    | GA | GG  | AA     | GA  | GG   |
|                    | Female | 177   | 201 | 60  | 38    | 38 | 5   | 257    | 613 | 333  |
| <b>rs3920540</b>   |        | GG    | TG  | TT  | GG    | TG | TT  | GG     | TG  | TT   |
|                    | Female | 9     | 112 | 317 | 0     | 21 | 72  | 24     | 252 | 922  |
| <b>rs61672954</b>  |        | AA    | GA  | GG  | AA    | GA | GG  | AA     | GA  | GG   |
|                    | Female | 0     | 32  | 406 | 0     | 4  | 100 | 13     | 214 | 976  |
|                    | Male   | 1     | 18  | 267 | 0     | 3  | 57  | 10     | 79  | 398  |

**Table S10. Previous candidate SNPs associated with Uyghur facial shape**

| SNP        | Chr. | BP <sup>a</sup> | Gene         | Discovered Trait <sup>b</sup>                        | Studied Trait                | <i>P</i>           |                    |                    |
|------------|------|-----------------|--------------|------------------------------------------------------|------------------------------|--------------------|--------------------|--------------------|
|            |      |                 |              |                                                      |                              | Female             | Male               | Mixed              |
| rs4648379  | 1    | 3261516         | PRDM16       | LAla-Prn-RAla                                        | LAla-Prn-RAla                | $7 \times 10^{-1}$ | $2 \times 10^{-1}$ | $2 \times 10^{-1}$ |
|            |      |                 |              |                                                      | angle of LAla-Prn-Rala       | $2 \times 10^{-1}$ | $3 \times 10^{-2}$ | $2 \times 10^{-2}$ |
| rs642961   | 1    | 209989270       | IRF6         | ULipP-Stm-LLipP                                      | ULipP-Stm-LLipP              | $5 \times 10^{-2}$ | $8 \times 10^{-1}$ | $2 \times 10^{-1}$ |
| rs3827760  | 2    | 109513601       | EDAR         | Chin protrusion                                      | angle of Sbn-ULipP-ChiP      | $6 \times 10^{-2}$ | $1 \times 10^{-1}$ | $1 \times 10^{-2}$ |
| rs7559271  | 2    | 223068286       | PAX3         | Nasion                                               | height of Nasion to eyes     | $6 \times 10^{-3}$ | $1 \times 10^{-1}$ | $2 \times 10^{-3}$ |
| rs17447439 | 3    | 189549423       | TP63         | EyeR-EyeL                                            | LExtCan-RExtCan              | $8 \times 10^{-1}$ | $5 \times 10^{-1}$ | 1                  |
| rs2045323  | 4    | 154831899       | DCHS2        | Columella inclination/Nose protrusion/Nose tip angle | height of Prn to Ala         | $6 \times 10^{-2}$ | $4 \times 10^{-2}$ | $8 \times 10^{-1}$ |
| rs6184     | 5    | 42719344        | GHR          | mandibular height (ear-Gn)                           | Ear-ChiP                     | $9 \times 10^{-2}$ | $3 \times 10^{-1}$ | $6 \times 10^{-1}$ |
| rs1852985  | 6    | 45329656        | SUPT3H/RUNX2 | Nose bridge breadth                                  | LAla-RAla                    | $7 \times 10^{-1}$ | $2 \times 10^{-1}$ | $2 \times 10^{-1}$ |
| rs7773292  | 6    | 132099761       | ENPP1        | upper and lower face height                          | Sbn-UlipP-ChiP               | $9 \times 10^{-1}$ | 1                  | 1                  |
| rs17640804 | 7    | 42131390        | GLI3         | Nose wing breadth                                    | LAla-RAla                    | $1 \times 10^{-1}$ | $1 \times 10^{-1}$ | $3 \times 10^{-2}$ |
| rs805722   | 10   | 105810400       | COL17A1      | EyeLR-Nsn                                            | LIntCan-Nsn-RExtCan          | $5 \times 10^{-1}$ | $3 \times 10^{-1}$ | $9 \times 10^{-1}$ |
|            |      |                 |              |                                                      | angle of LIntCan-Nsn-RExtCan | $4 \times 10^{-3}$ | $8 \times 10^{-1}$ | $2 \times 10^{-2}$ |
| rs927833   | 20   | 22041577        | PAX1         | Nose wing breadth                                    | LAla-RAla                    | $5 \times 10^{-1}$ | $8 \times 10^{-3}$ | $3 \times 10^{-2}$ |

<sup>a</sup>NCBI build 37

<sup>b</sup>original measurements in previous studies

**Table S11. Top SNPs information used for prediction.** To capture the majority of the facial shape variance for prediction, both ancestry-divergent phenotypes and within-Uyghur phenotypes were defined and analyzed by GWA, and any autosomal SNPs that passed the threshold of  $P < 1 \times 10^{-6}$  in any test were combined into the panel of the top 277 SNPs.

available in separate excel file, see S11\_Table.xlsx

**Table S12. Single-statistic test of LD-trimming prediction models.** The top SNPs set were trimmed either by pairwise LD ( $r^2 < 0.8$ , 240 top SNPs set) or inter-marker physical distance ( $> 400\text{kb}$ , 209 top SNPs set). The values are the probability of predicted statistic distributed on the relative random normal distribution calculated like normal one-side  $P$  value.

|        | <b>240-SNP-set model</b> |                   | <b>209-SNP-set model</b> |                   |
|--------|--------------------------|-------------------|--------------------------|-------------------|
|        | <b>PF vs. RGF</b>        | <b>PF vs. RAF</b> | <b>PF vs. RGF</b>        | <b>PF vs. RAF</b> |
| Female | 0.6                      | 0.6               | 0.7                      | 0.6               |
| Male   | 0.02                     | 0.015             | 0.015                    | 0.02              |

**Table S13. Evaluation of the face prediction in hypothetical forensic scenarios (8 candidates) using 240-SNP and 209-SNP face prediction models.** SSA as accuracy statistics are evaluated in UIG-R. The true accuracy rate based on SSA are determined by examining how many cases of successful identification were achieved in all combined iterations. The random accuracy rate is calculated after reshuffling the pairwise corresponds between actual face and PF. This process was repeated 1,000 times to obtain random accuracy rates under null hypothesis, the mean of which summarize the null distribution. The *P* values are the proportion of how many random accuracy rates were larger than true accuracy rate calculated as the empirical p-value.

|        | 240-SNP-set model       |                               |          | 209-SNP-set model       |                              |          |
|--------|-------------------------|-------------------------------|----------|-------------------------|------------------------------|----------|
|        | predicted accuracy rate | mean of random accuracy rates | <i>P</i> | predicted accuracy rate | mean of random accuracy rate | <i>P</i> |
| Female | 12.8%                   | 12.4%                         | 0.4      | 12.9%                   | 12.5%                        | 0.4      |
| Male   | 15.2%                   | 12.3%                         | 0.2      | 13.9%                   | 12.9%                        | 0.4      |

**Table S14. Quality control of six index SNPs genotyping by SNaPshot**

| <b>SNP</b>  | <b>Chr.</b> | <b>BP</b> | <b>call rate (%)</b> | <b>HWE (P value)</b> | <b>MAF (SNaPshot)</b> |       |
|-------------|-------------|-----------|----------------------|----------------------|-----------------------|-------|
| rs1868752   | 11          | 122391442 | 98.51                | 1                    | G                     | 0.045 |
| rs118078182 | 5           | 177922198 | 98.34                | 0.7329               | A                     | 0.19  |
| rs60159418  | 4           | 31120752  | 97.77                | 0.0666               | G                     | 0.28  |
| rs17868256  | 2           | 52032773  | 98.57                | 0.2814               | A                     | 0.47  |
| rs3920540   | 20          | 7067738   | 97.71                | 0.1015               | G                     | 0.13  |
| rs61672954  | 3           | 82196528  | 98.46                | 0.1355               | A                     | 0.10  |



## **SUPPLEMENTARY MOVIES**

(available in separate files)

**Movie S1. 3D visualization of extrapolated face affected by rs1868752.**

**Movie S2. 3D visualization of extrapolated face affected by rs118078182.**

**Movie S3. 3D visualization of extrapolated face affected by rs60159418.**

**Movie S4. 3D visualization of extrapolated face affected by rs17868256.**

**Movie S5. 3D visualization of extrapolated face affected by rs3920540.**

**Movie S6. 3D visualization of extrapolated face affected by rs61672954.**

**Movie S7. 3D visualization of actual face and predicted face.**
